# Supplementary material for: Panethnic Differences in Blood Pressure in Europe: A Systematic Review and Meta-Analysis
Source: PubMed Central journal article supplement (PMC4725677; doi:10.1371/journal.pone.0147601), 2016-01-25
Supplement: pone.0147601.s003.pdf [file pone.0147601.s003.pdf]

**S1 Table.** Influential analysis (Random effects model) for systolic blood pressure weighted mean difference (WMD)

| <b>SA Women</b>                            | <b>Systolic WMD</b> | <b>95% Confidence Interval</b> |              | <b>p-value</b> | <b><math>\tau^2</math></b> | <b>I<sup>2</sup></b> |
|--------------------------------------------|---------------------|--------------------------------|--------------|----------------|----------------------------|----------------------|
| Omitting McKeigue et al 1988               | -2.73               | -5.25                          | -0.22        | 0.0334         | 31.9328                    | 96.20%               |
| Omitting Cruickshank et al 1991            | -2.90               | -5.43                          | -0.37        | 0.0246         | 32.1188                    | 96.20%               |
| Omitting McKeigue et al 1991               | -3.39               | -5.90                          | -0.88        | 0.0082         | 31.2989                    | 96.10%               |
| Omitting Simmons et al 1993                | -3.18               | -5.83                          | -0.53        | 0.0187         | 34.9599                    | 96.00%               |
| Omitting Cappuccio et al 1998              | -3.33               | -5.86                          | -0.80        | 0.0099         | 31.636                     | 96.10%               |
| Omitting Bhopal et al 1999 (Indians)       | -3.16               | -5.70                          | -0.62        | 0.0149         | 32.1969                    | 96.20%               |
| Omitting Bhopal et al 1999 (Pakistanis)    | -2.86               | -5.40                          | -0.31        | 0.0277         | 32.2665                    | 96.20%               |
| Omitting Bhopal et al 1999 (Bangladeshi)   | -2.57               | -5.08                          | -0.05        | 0.0453         | 31.4473                    | 96.10%               |
| Omitting HSE 1999 (Indians)                | -2.83               | -5.43                          | -0.24        | 0.0324         | 33.4324                    | 96.20%               |
| Omitting HSE 1999 (Pakistanis)             | -2.67               | -5.19                          | -0.15        | 0.0375         | 31.3066                    | 95.90%               |
| Omitting HSE 1999 (Bangladeshis)           | -2.53               | -4.93                          | -0.13        | 0.0391         | 28.1792                    | 95.40%               |
| Omitting Whitty et al 1999                 | -3.10               | -5.71                          | -0.49        | 0.0199         | 33.789                     | 96.20%               |
| Omitting HSE 2004 (Indians)                | -2.78               | -5.35                          | -0.22        | 0.0334         | 32.5896                    | 96.20%               |
| Omitting HSE 2004 (Pakistanis)             | -2.67               | -5.20                          | -0.15        | 0.0382         | 31.5528                    | 96.00%               |
| Omitting HSE 2004 (Bangladeshis)           | -2.66               | -5.18                          | -0.13        | 0.0394         | 31.6868                    | 96.10%               |
| Omitting Agyemang et al 2005               | -3.63               | -6.07                          | -1.20        | 0.0035         | 29.2692                    | 95.80%               |
| Omitting Lyratzopoulos et al 2005          | -3.09               | -5.64                          | -0.53        | 0.0181         | 32.5442                    | 96.20%               |
| Omitting Glenday et al 2006 (Pakistanis)   | -2.97               | -5.56                          | -0.38        | 0.0248         | 33.4295                    | 96.20%               |
| Omitting Glenday et al 2006 (Sri Lankians) | -2.82               | -5.43                          | -0.20        | 0.0347         | 33.9688                    | 96.10%               |
| Omitting Gray et al 2011                   | -2.86               | -5.48                          | -0.23        | 0.0328         | 34.2557                    | 96.20%               |
| Omitting Rabanal et al 2012                | -3.15               | -5.78                          | -0.52        | 0.0188         | 34.3707                    | 96.10%               |
| Omitting Agyemang et al 2015               | -3.42               | -5.69                          | -1.15        | 0.0032         | 24.9495                    | 94.60%               |
| <b>Pooled estimate</b>                     | <b>-2.97</b>        | <b>-5.45</b>                   | <b>-0.49</b> | <b>0.019</b>   | <b>31.9519</b>             | <b>96.10%</b>        |

  

| <b>SA Men</b>                            | <b>Systolic WMD</b> | <b>95% Confidence Interval</b> |       | <b>p-value</b> | <b><math>\tau^2</math></b> | <b>I<sup>2</sup></b> |
|------------------------------------------|---------------------|--------------------------------|-------|----------------|----------------------------|----------------------|
| Omitting McKeigue et al 1988             | -4.40               | -6.06                          | -2.75 | < 0.0001       | 15.5871                    | 93.60%               |
| Omitting Cruickshank et al 1991          | -4.84               | -6.48                          | -3.20 | < 0.0001       | 15.4145                    | 93.60%               |
| Omitting McKeigue et al 1991             | -4.98               | -6.42                          | -3.54 | < 0.0001       | 11.1813                    | 90.80%               |
| Omitting Knight et al 1992               | -4.52               | -6.19                          | -2.85 | < 0.0001       | 15.8275                    | 93.70%               |
| Omitting Knight et al 1993               | -4.54               | -6.21                          | -2.87 | < 0.0001       | 15.8854                    | 93.70%               |
| Omitting Simmons et al 1993              | -4.64               | -6.40                          | -2.89 | < 0.0001       | 17.5556                    | 93.70%               |
| Omitting Cappuccio et al 1998            | -4.86               | -6.51                          | -3.22 | < 0.0001       | 15.2829                    | 93.50%               |
| Omitting Bhopal et al 1999 (Indians)     | -4.55               | -6.21                          | -2.88 | < 0.0001       | 15.8432                    | 93.70%               |
| Omitting Bhopal et al 1999 (Pakistanis)  | -4.36               | -6.02                          | -2.71 | < 0.0001       | 15.4367                    | 93.50%               |
| Omitting Bhopal et al 1999 (Bangladeshi) | -4.17               | -5.77                          | -2.56 | < 0.0001       | 14.6001                    | 93.20%               |
| Omitting HSE 1999 (Indians)              | -4.66               | -6.37                          | -2.94 | < 0.0001       | 16.6503                    | 93.70%               |
| Omitting HSE 1999 (Pakistanis)           | -4.49               | -6.18                          | -2.80 | < 0.0001       | 16.1558                    | 93.50%               |
| Omitting HSE 1999 (Bangladeshis)         | -4.36               | -6.00                          | -2.72 | < 0.0001       | 15.0396                    | 93.20%               |
| Omitting Whitty et al 1999               | -4.69               | -6.43                          | -2.94 | < 0.0001       | 17.2491                    | 93.60%               |
| Omitting Lane 2002                       | -4.67               | -6.35                          | -2.99 | < 0.0001       | 16.0485                    | 93.70%               |

|                                            |              |              |              |                   |                |               |
|--------------------------------------------|--------------|--------------|--------------|-------------------|----------------|---------------|
| Omitting HSE 2004 (Indians)                | -4.59        | -6.28        | -2.90        | < 0.0001          | 16.1624        | 93.70%        |
| Omitting HSE 2004 (Pakistanis)             | -4.46        | -6.13        | -2.79        | < 0.0001          | 15.7946        | 93.60%        |
| Omitting HSE 2004 (Bangladeshis)           | -4.32        | -5.95        | -2.69        | < 0.0001          | 14.9400        | 93.30%        |
| Omitting Agyemang et al 2005               | -4.80        | -6.46        | -3.14        | < 0.0001          | 15.5890        | 93.60%        |
| Omitting Lyratzopoulos et al 2005          | -4.48        | -6.16        | -2.81        | < 0.0001          | 15.8387        | 93.70%        |
| Omitting Glenday et al 2006 (Pakistanis)   | -4.59        | -6.30        | -2.89        | < 0.0001          | 16.4800        | 93.70%        |
| Omitting Glenday et al 2006 (Sri Lankians) | -4.46        | -6.14        | -2.77        | < 0.0001          | 15.9751        | 93.20%        |
| Omitting Gualdi-Russo et al 2009           | -4.25        | -5.85        | -2.66        | < 0.0001          | 14.1884        | 92.90%        |
| Omitting Gray et al 2011                   | -4.63        | -6.36        | -2.91        | < 0.0001          | 16.8865        | 93.70%        |
| Omitting Rabanal et al 2012                | -4.63        | -6.38        | -2.87        | < 0.0001          | 17.5435        | 93.70%        |
| Omitting Agyemang et al 2015               | -4.81        | -6.46        | -3.16        | < 0.0001          | 15.2481        | 93.00%        |
| <b>Pooled estimate</b>                     | <b>-4.57</b> | <b>-6.20</b> | <b>-2.93</b> | <b>&lt;0.0001</b> | <b>15.6804</b> | <b>93.50%</b> |

| <b>SSA Women</b>                  | <b>Systolic WMD</b> | <b>95% Confidence Interval</b> |             | <b>p-value</b> | <b><math>\tau^2</math></b> | <b>I<sup>2</sup></b> |
|-----------------------------------|---------------------|--------------------------------|-------------|----------------|----------------------------|----------------------|
| Omitting Meade 1978               | 5.96                | 2.04                           | 9.87        | 0.0029         | 51.7041                    | 96.10%               |
| Omitting Sever 1979               | 5.39                | 1.52                           | 9.25        | 0.0063         | 50.3579                    | 96.00%               |
| Omitting Haines 1987              | 6.73                | 2.89                           | 10.58       | 0.0006         | 49.0332                    | 95.60%               |
| Omitting Cruickshank 1991         | 6.13                | 2.21                           | 10.05       | 0.0022         | 51.7864                    | 96.10%               |
| Omitting Chaturvedi 1993          | 5.24                | 1.41                           | 9.08        | 0.0074         | 48.9719                    | 95.80%               |
| Omitting Cappuccio 1998           | 5.66                | 1.68                           | 9.65        | 0.0054         | 52.9141                    | 95.90%               |
| Omitting Whitty et al 1999        | 6.14                | 1.95                           | 10.34       | 0.0041         | 59.0718                    | 96.10%               |
| Omitting HSE 1999                 | 6.67                | 2.97                           | 10.37       | 0.0004         | 44.8490                    | 94.60%               |
| Omitting Lane et al 2002          | 5.61                | 1.68                           | 9.55        | 0.0051         | 51.5389                    | 96.00%               |
| Omitting HSE 2004 (BC)            | 6.67                | 2.79                           | 10.55       | 0.0007         | 49.8003                    | 95.60%               |
| Omitting HSE 2004 (BA)            | 7.00                | 3.30                           | 10.69       | 0.0002         | 44.8092                    | 95.30%               |
| Omitting Agyemang et al 2005      | 5.52                | 1.61                           | 9.44        | 0.0057         | 50.8973                    | 95.80%               |
| Omitting Rabanal et al 2012       | 6.11                | 2.11                           | 10.11       | 0.0027         | 53.4121                    | 96.10%               |
| Omitting Agyemang et al 2015 (AS) | 5.75                | 1.62                           | 9.87        | 0.0064         | 56.9091                    | 95.50%               |
| Omitting Agyemang et al 2015 (G)  | 5.47                | 1.60                           | 9.34        | 0.0056         | 49.5323                    | 95.50%               |
| Omitting HSE 2004 (BA)            | 7.00                | 3.30                           | 10.69       | 0.0002         | 44.8092                    | 95.30%               |
| <b>Pooled estimate</b>            | <b>6.00</b>         | <b>2.22</b>                    | <b>9.78</b> | <b>0.0018</b>  | <b>50.9320</b>             | <b>95.80%</b>        |

| <b>SSA Men</b>            | <b>Systolic WMD</b> | <b>95% Confidence Interval</b> |      | <b>p-value</b> | <b><math>\tau^2</math></b> | <b>I<sup>2</sup></b> |
|---------------------------|---------------------|--------------------------------|------|----------------|----------------------------|----------------------|
| Omitting Meade 1978       | 3.12                | 0.95                           | 5.29 | 0.0048         | 16.5151                    | 90.70%               |
| Omitting Sever 1979       | 3.27                | 1.12                           | 5.43 | 0.0029         | 16.5917                    | 90.80%               |
| Omitting Haines 1987      | 3.67                | 1.52                           | 5.82 | 0.0008         | 16.1295                    | 90.30%               |
| Omitting Cruickshank 1991 | 3.16                | 1.02                           | 5.30 | 0.0038         | 16.4043                    | 90.80%               |
| Omitting McKeigue 1991    | 3.12                | 0.90                           | 5.34 | 0.0058         | 17.1805                    | 89.70%               |
| Omitting Chaturvedi 1993  | 3.24                | 1.07                           | 5.42 | 0.0035         | 16.6996                    | 90.80%               |
| Omitting Cappuccio 1998   | 3.22                | 1.03                           | 5.42 | 0.004          | 16.956                     | 90.80%               |
| Omitting Whitty 1999      | 3.47                | 1.15                           | 5.78 | 0.0033         | 18.9189                    | 90.60%               |
| Omitting HSE 1999         | 3.65                | 1.50                           | 5.80 | 0.0009         | 15.9677                    | 89.50%               |

|                                   |             |             |             |               |                |               |
|-----------------------------------|-------------|-------------|-------------|---------------|----------------|---------------|
| Omitting Lane et al 2002          | 3.22        | 1.00        | 5.43        | 0.0045        | 17.2515        | 90.70%        |
| Omitting HSE 2004 (BC)            | 3.48        | 1.27        | 5.69        | 0.0021        | 17.1794        | 90.80%        |
| Omitting HSE 2004 (BA)            | 3.80        | 1.70        | 5.89        | 0.0004        | 15.1327        | 89.80%        |
| Omitting Agyemang et al 2005      | 3.09        | 0.92        | 5.26        | 0.0053        | 16.4854        | 90.50%        |
| Omitting Gualdi-Russo et al 2009  | 4.00        | 2.03        | 5.96        | < 0.0001      | 13.0346        | 88.40%        |
| Omitting Rabanal et al 2012       | 3.73        | 1.60        | 5.85        | 0.0006        | 15.5467        | 89.90%        |
| Omitting Agyemang et al 2015 (AS) | 3.25        | 0.96        | 5.55        | 0.0054        | 18.5202        | 90.70%        |
| Omitting Agyemang et al 2015 (G)  | 2.96        | 0.90        | 5.03        | 0.0049        | 14.4584        | 88.40%        |
| <b>Pooled estimate</b>            | <b>3.38</b> | <b>1.28</b> | <b>5.48</b> | <b>0.0016</b> | <b>16.3638</b> | <b>90.30%</b> |
