# Supplementary material for: Panethnic Differences in Blood Pressure in Europe: A Systematic Review and Meta-Analysis
Source: PubMed Central journal article supplement (PMC4725677; doi:10.1371/journal.pone.0147601), 2016-01-25
Supplement: pone.0147601.s004.pdf [file pone.0147601.s004.pdf]

**S2 Table.** Influential analysis (Random effects model) for Diastolic blood pressure weighted mean difference (WMD)

| <b>SA Women</b>                            | <b>Diastolic WMD</b> | <b>95% Confidence Interval</b> |             | <b>p-value</b> | <b><math>\tau^2</math></b> | <b>I<sup>2</sup></b> |
|--------------------------------------------|----------------------|--------------------------------|-------------|----------------|----------------------------|----------------------|
| Omitting McKeigue et al 1988               | -0.08                | -1.09                          | 0.92        | 0.8696         | 4.4306                     | 93.30%               |
| Omitting Cruickshank et al 1991            | 0.10                 | -0.89                          | 1.08        | 0.8449         | 4.2139                     | 93.00%               |
| Omitting McKeigue et al 1991               | -0.19                | -1.22                          | 0.84        | 0.7208         | 4.5254                     | 93.30%               |
| Omitting Simmons et al 1993                | -0.21                | -1.29                          | 0.87        | 0.7022         | 5.0417                     | 93.20%               |
| Omitting Cappuccio et al 1998              | -0.27                | -1.29                          | 0.75        | 0.6011         | 4.4185                     | 93.10%               |
| Omitting Bhopal et al 1999 (Indians)       | -0.12                | -1.14                          | 0.91        | 0.8237         | 4.4906                     | 93.30%               |
| Omitting Bhopal et al 1999 (Pakistanis)    | -0.10                | -1.12                          | 0.92        | 0.8513         | 4.4824                     | 93.30%               |
| Omitting Bhopal et al 1999 (Bangladeshi)   | -0.03                | -1.05                          | 0.98        | 0.9487         | 4.4211                     | 93.30%               |
| Omitting HSE 1999 (Indians)                | -0.12                | -1.18                          | 0.94        | 0.8217         | 4.7896                     | 93.30%               |
| Omitting HSE 1999 (Pakistanis)             | 0.03                 | -0.97                          | 1.02        | 0.9563         | 4.1351                     | 92.30%               |
| Omitting HSE 1999 (Bangladeshis)           | -0.02                | -1.05                          | 1.00        | 0.9625         | 4.4345                     | 92.90%               |
| Omitting Whitty et al 1999                 | -0.20                | -1.36                          | 0.97        | 0.7380         | 5.9706                     | 93.30%               |
| Omitting HSE 2004 (Indians)                | -0.17                | -1.20                          | 0.87        | 0.7535         | 4.5962                     | 93.30%               |
| Omitting HSE 2004 (Pakistanis)             | -0.14                | -1.17                          | 0.90        | 0.7942         | 4.5566                     | 93.30%               |
| Omitting HSE 2004 (Bangladeshis)           | -0.09                | -1.12                          | 0.93        | 0.8555         | 4.4725                     | 93.30%               |
| Omitting Agyemang et al 2005               | -0.44                | -1.40                          | 0.53        | 0.3760         | 3.9034                     | 92.40%               |
| Omitting Lyratzopoulos et al 2005          | -0.12                | -1.14                          | 0.91        | 0.8245         | 4.5035                     | 93.30%               |
| Omitting Glenday et al 2006 (Pakistanis)   | -0.08                | -1.12                          | 0.95        | 0.8754         | 4.5475                     | 93.30%               |
| Omitting Glenday et al 2006 (Sri Lankians) | 0.06                 | -0.91                          | 1.03        | 0.9012         | 3.8845                     | 91.80%               |
| Omitting Gray et al 2011                   | -0.15                | -1.21                          | 0.92        | 0.7875         | 4.8278                     | 93.30%               |
| Omitting Agyemang et al 2015               | -0.34                | -1.18                          | 0.50        | 0.4248         | 2.7374                     | 88.40%               |
| <b>Pooled estimate</b>                     | <b>-0.13</b>         | <b>-1.12</b>                   | <b>0.87</b> | <b>0.8026</b>  | <b>4.4210</b>              | <b>93.00%</b>        |
|                                            |                      |                                |             |                |                            |                      |
| <b>SA Men</b>                              | <b>Diastolic WMD</b> | <b>95% Confidence Interval</b> |             | <b>p-value</b> | <b><math>\tau^2</math></b> | <b>I<sup>2</sup></b> |
| Omitting McKeigue et al 1988               | -0.47                | -1.64                          | 0.69        | 0.4244         | 7.4947                     | 94.60%               |
| Omitting Cruickshank et al 1991            | -0.58                | -1.74                          | 0.58        | 0.3285         | 7.5833                     | 94.70%               |
| Omitting McKeigue et al 1991               | -0.77                | -1.90                          | 0.36        | 0.1833         | 6.9560                     | 93.40%               |
| Omitting Knight et al 1992                 | -0.58                | -1.76                          | 0.59        | 0.3289         | 7.6402                     | 94.70%               |
| Omitting Knight et al 1993                 | -0.62                | -1.79                          | 0.56        | 0.3037         | 7.6700                     | 94.70%               |
| Omitting Simmons et al 1993                | -0.77                | -1.91                          | 0.37        | 0.1868         | 7.1337                     | 93.70%               |
| Omitting Cappuccio et al 1998              | -0.73                | -1.90                          | 0.44        | 0.2236         | 7.6140                     | 94.60%               |
| Omitting Bhopal et al 1999 (Indians)       | -0.36                | -1.50                          | 0.78        | 0.5340         | 7.2218                     | 94.40%               |
| Omitting Bhopal et al 1999 (Pakistanis)    | -0.29                | -1.41                          | 0.82        | 0.6070         | 6.8404                     | 94.10%               |
| Omitting Bhopal et al 1999 (Bangladeshi)   | -0.18                | -1.26                          | 0.91        | 0.7489         | 6.4019                     | 93.70%               |
| Omitting HSE 1999 (Indians)                | -0.65                | -1.86                          | 0.56        | 0.2920         | 8.1228                     | 94.70%               |
| Omitting HSE 1999 (Pakistanis)             | -0.46                | -1.60                          | 0.68        | 0.4303         | 7.1840                     | 94.10%               |
| Omitting HSE 1999 (Bangladeshis)           | -0.48                | -1.64                          | 0.68        | 0.4175         | 7.3770                     | 94.30%               |
| Omitting Whitty et al 1999                 | -0.63                | -1.86                          | 0.60        | 0.3133         | 8.4332                     | 94.70%               |
| Omitting Lane 2002                         | -0.55                | -1.73                          | 0.62        | 0.3569         | 7.6545                     | 94.60%               |
| Omitting HSE 2004 (Indians)                | -0.63                | -1.81                          | 0.55        | 0.2959         | 7.7609                     | 94.70%               |

|                                            |              |              |             |               |               |               |
|--------------------------------------------|--------------|--------------|-------------|---------------|---------------|---------------|
| Omitting HSE 2004 (Pakistanis)             | -0.57        | -1.75        | 0.61        | 0.3427        | 7.6715        | 94.70%        |
| Omitting HSE 2004 (Bangladeshis)           | -0.50        | -1.67        | 0.67        | 0.4014        | 7.5351        | 94.60%        |
| Omitting Agyemang et al 2005               | -0.78        | -1.94        | 0.39        | 0.1902        | 7.4585        | 94.50%        |
| Omitting Lyratzopoulos et al 2005          | -0.48        | -1.65        | 0.68        | 0.4162        | 7.4868        | 94.50%        |
| Omitting Glenday et al 2006 (Pakistanis)   | -0.68        | -1.87        | 0.51        | 0.2601        | 7.8523        | 94.70%        |
| Omitting Glenday et al 2006 (Sri Lankians) | -0.65        | -1.87        | 0.57        | 0.2977        | 8.3026        | 94.70%        |
| Omitting Gualdi-Russo et al 2009           | -0.42        | -1.57        | 0.73        | 0.4729        | 7.2629        | 94.40%        |
| Omitting Gray et al 2011                   | -0.59        | -1.80        | 0.62        | 0.3416        | 8.1142        | 94.60%        |
| Omitting Agyemang et al 2015               | -0.70        | -1.92        | 0.51        | 0.2567        | 8.1821        | 94.60%        |
| <b>Pooled estimate</b>                     | <b>-0.56</b> | <b>-1.71</b> | <b>0.58</b> | <b>0.3336</b> | <b>7.5473</b> | <b>94.50%</b> |

| <b>SSA Women</b>                  | <b>Diastolic<br/>WMD</b> | <b>95%<br/>Confidence Interval</b> |             | <b>p-value</b>     | <b><math>\tau^2</math></b> | <b>I<sup>2</sup></b> |
|-----------------------------------|--------------------------|------------------------------------|-------------|--------------------|----------------------------|----------------------|
| Omitting Meade 1978               | 5.40                     | 3.01                               | 7.80        | < 0.0001           | 17.5450                    | 96.50%               |
| Omitting Sever 1979               | 4.98                     | 2.64                               | 7.33        | < 0.0001           | 17.1600                    | 96.40%               |
| Omitting Haines 1987              | 5.82                     | 3.45                               | 8.19        | < 0.0001           | 16.8124                    | 96.20%               |
| Omitting Cruickshank 1991         | 5.31                     | 2.91                               | 7.71        | < 0.0001           | 17.5565                    | 96.50%               |
| Omitting Chaturvedi 1993          | 4.92                     | 2.55                               | 7.29        | < 0.0001           | 16.9454                    | 96.30%               |
| Omitting Cappuccio 1998           | 5.19                     | 2.70                               | 7.67        | < 0.0001           | 18.6671                    | 96.30%               |
| Omitting Whitty et al 1999        | 5.52                     | 3.05                               | 7.99        | < 0.0001           | 18.4211                    | 96.40%               |
| Omitting HSE 1999                 | 5.76                     | 3.73                               | 7.79        | < 0.0001           | 11.7872                    | 93.40%               |
| Omitting Lane et al 2002          | 5.12                     | 2.70                               | 7.53        | < 0.0001           | 17.5999                    | 96.40%               |
| Omitting HSE 2004 (BC)            | 5.75                     | 3.36                               | 8.14        | < 0.0001           | 17.1714                    | 96.20%               |
| Omitting HSE 2004 (BA)            | 5.81                     | 3.44                               | 8.18        | < 0.0001           | 16.9119                    | 96.20%               |
| Omitting Agyemang et al 2005      | 5.10                     | 2.66                               | 7.53        | < 0.0001           | 17.8195                    | 96.30%               |
| Omitting Agyemang et al 2015 (AS) | 5.29                     | 2.63                               | 7.94        | < 0.0001           | 21.5846                    | 96.30%               |
| Omitting Agyemang et al 2015 (G)  | 4.98                     | 2.70                               | 7.27        | < 0.0001           | 15.4544                    | 95.00%               |
| <b>Pooled estimate</b>            | <b>5.35</b>              | <b>3.04</b>                        | <b>7.66</b> | <b>&lt; 0.0001</b> | <b>17.3024</b>             | <b>96.20%</b>        |

| <b>SSA Men</b>             | <b>Diastolic<br/>WMD</b> | <b>95%<br/>Confidence Interval</b> |      | <b>p-value</b> | <b><math>\tau^2</math></b> | <b>I<sup>2</sup></b> |
|----------------------------|--------------------------|------------------------------------|------|----------------|----------------------------|----------------------|
| Omitting Meade 1978        | 5.40                     | 3.01                               | 7.80 | < 0.0001       | 17.5450                    | 96.50%               |
| Omitting Sever 1979        | 4.98                     | 2.64                               | 7.33 | < 0.0001       | 17.1600                    | 96.40%               |
| Omitting Haines 1987       | 5.82                     | 3.45                               | 8.19 | < 0.0001       | 16.8124                    | 96.20%               |
| Omitting Cruickshank 1991  | 5.31                     | 2.91                               | 7.71 | < 0.0001       | 17.5565                    | 96.50%               |
| Omitting Chaturvedi 1993   | 4.92                     | 2.55                               | 7.29 | < 0.0001       | 16.9454                    | 96.30%               |
| Omitting Cappuccio 1998    | 5.19                     | 2.70                               | 7.67 | < 0.0001       | 18.6671                    | 96.30%               |
| Omitting Whitty et al 1999 | 5.52                     | 3.05                               | 7.99 | < 0.0001       | 18.4211                    | 96.40%               |
| Omitting HSE 1999          | 5.76                     | 3.73                               | 7.79 | < 0.0001       | 11.7872                    | 93.40%               |
| Omitting Lane et al 2002   | 5.12                     | 2.70                               | 7.53 | < 0.0001       | 17.5999                    | 96.40%               |
| Omitting HSE 2004 (BC)     | 5.75                     | 3.36                               | 8.14 | < 0.0001       | 17.1714                    | 96.20%               |
| Omitting HSE 2004 (BA)     | 5.81                     | 3.44                               | 8.18 | < 0.0001       | 16.9119                    | 96.20%               |

|                                   |             |             |             |                    |                |               |
|-----------------------------------|-------------|-------------|-------------|--------------------|----------------|---------------|
| Omitting Agyemang et al 2005      | 5.10        | 2.66        | 7.53        | < 0.0001           | 17.8195        | 96.30%        |
| Omitting Agyemang et al 2015 (AS) | 5.29        | 2.63        | 7.94        | < 0.0001           | 21.5846        | 96.30%        |
| Omitting Agyemang et al 2015 (G)  | 4.98        | 2.70        | 7.27        | < 0.0001           | 15.4544        | 95.00%        |
| <b>Pooled estimate</b>            | <b>5.35</b> | <b>3.04</b> | <b>7.66</b> | <b>&lt; 0.0001</b> | <b>17.3024</b> | <b>96.20%</b> |
