# Supplementary material for: Panethnic Differences in Blood Pressure in Europe: A Systematic Review and Meta-Analysis
Source: PubMed Central journal article supplement (PMC4725677; doi:10.1371/journal.pone.0147601), 2016-01-25
Supplement: pone.0147601.s005.pdf [file pone.0147601.s005.pdf]

**S3 Table.** Effect of study quality on estimates of systolic (A) and diastolic (B) blood pressure (random effect metaregression)

**A.**

| <b>Variables</b>                 | <b>Point Estimate</b> | <b>95% CIs</b>  | <b>p-value</b> | <b>Multiplicity adjusted p-value</b> |
|----------------------------------|-----------------------|-----------------|----------------|--------------------------------------|
| <i>Men (n=43)</i>                |                       |                 |                |                                      |
| <b>Panethnicity</b> (SSA vs. SA) | 8.051                 | 4.879 to 11.223 | <0.001         | <0.001                               |
| <b>NOS</b> (1 unit increase)     | 0.213                 | -1.497 to 1.922 | 0.730          | 0.900                                |
| <i>Women (n=37)</i>              |                       |                 |                |                                      |
| <b>Panethnicity</b> (SSA vs. SA) | 8.516                 | 3.819 to 13.212 | <0.001         | 0.001                                |
| <b>NOS</b> (1 unit increase)     | -1.345                | -4.432 to 1.742 | 0.393          | 0.610                                |

SSA= Sub-Saharan Africans; SA = South Asians; EU = Europeans.

NOS = Newcastle-Ottawa Quality Score

**B.**

| <b>Variables</b>                 | <b>Point Estimate</b> | <b>95% CIs</b>  | <b>p-value</b> | <b>Multiplicity adjusted p-value</b> |
|----------------------------------|-----------------------|-----------------|----------------|--------------------------------------|
| <i>Men (n=41)</i>                |                       |                 |                |                                      |
| <b>Panethnicity</b> (SSA vs. SA) | 3.974                 | 1.814 to 6.134  | <0.001         | <0.001                               |
| <b>NOS</b> (1 unit increase)     | 0.226                 | -0.926 to 1.379 | 0.701          | 0.940                                |
| <i>Women (n=35)</i>              |                       |                 |                |                                      |
| <b>Panethnicity</b> (SSA vs. SA) | 5.474                 | 3.007 to 7.941  | <0.001         | <0.001                               |
| <b>NOS</b> (1 unit increase)     | -0.104                | -1.823 to 1.615 | 0.906          | 0.980                                |

SSA= Sub-Saharan Africans; SA = South Asians; EU = Europeans.

NOS = Newcastle-Ottawa Quality Score
