# Supplementary material for: Panethnic Differences in Blood Pressure in Europe: A Systematic Review and Meta-Analysis
Source: PubMed Central journal article supplement (PMC4725677; doi:10.1371/journal.pone.0147601), 2016-01-25
Supplement: pone.0147601.s008.pdf [file pone.0147601.s008.pdf]

# Sub Saharan Africans

Author - Year

Systolic BP  
Weighted Mean  
Difference  
(95% CI)

## MEN

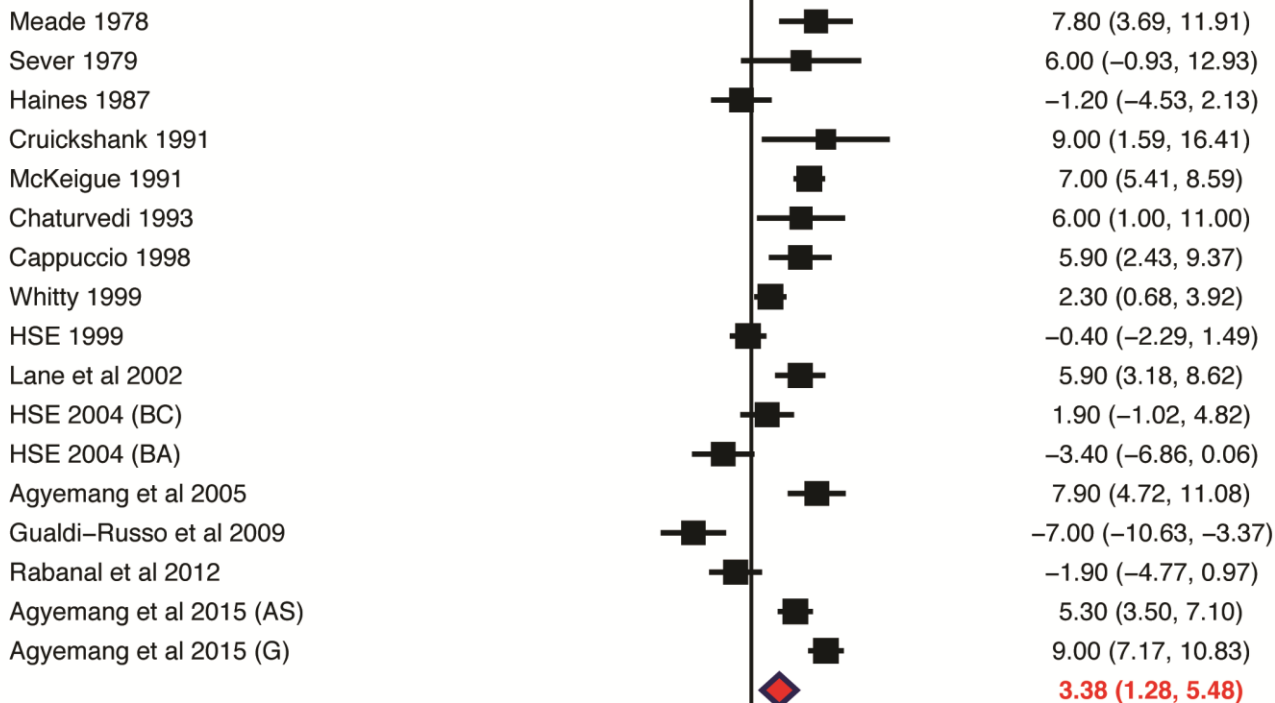

## WOMEN

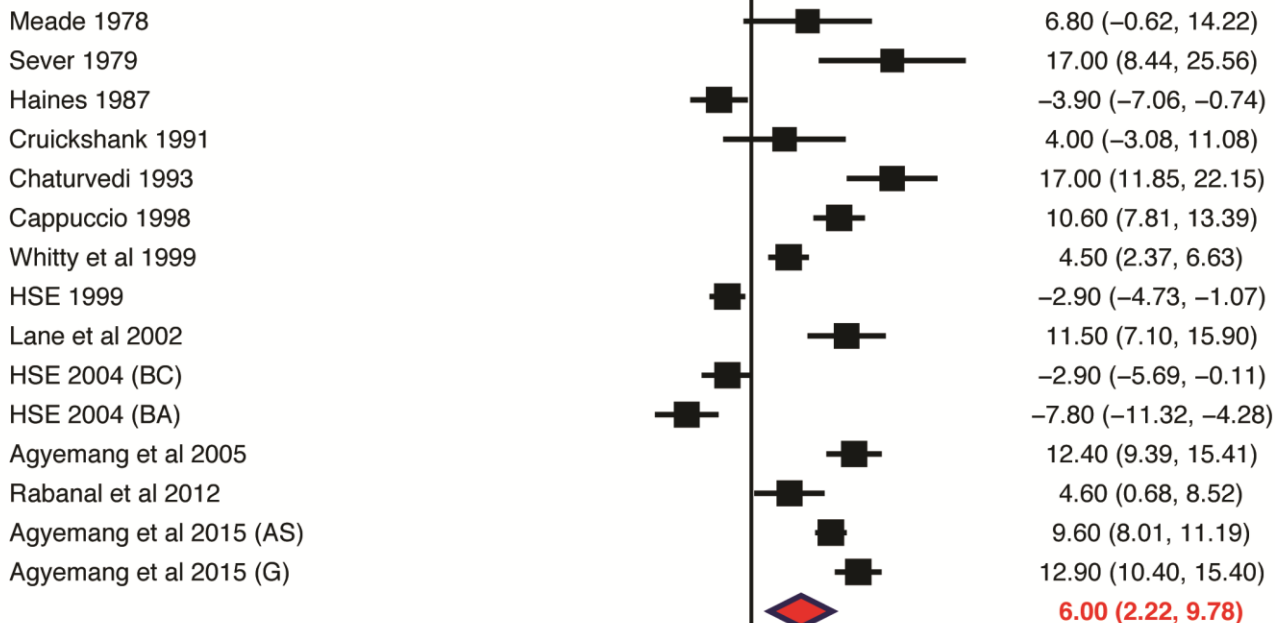

-10 -5 0 5 10  
mmHg
