# Supplementary material for: Panethnic Differences in Blood Pressure in Europe: A Systematic Review and Meta-Analysis
Source: PubMed Central journal article supplement (PMC4725677; doi:10.1371/journal.pone.0147601), 2016-01-25
Supplement: pone.0147601.s011.pdf [file pone.0147601.s011.pdf]

# Country of Origin

**Systolic BP  
Weighted Mean  
Difference  
(95% CI)**

*N. of Participants*  

---

*Migrants*      *EU  
Controls*

## **BANGLADESH (n=8)**

$z = 16.01$ ;  $p < 0.001$

$I^2 = 20.7\%$ ,  $p = 0.266$

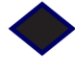

-10.82 (-12.14, -9.50)

957

7429

## **PAKISTAN (n=9)**

$z = 7.53$ ;  $p < 0.001$

$I^2 = 81.4\%$ ,  $p < 0.001$

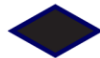

-7.26 (-9.15, -5.37)

1873

12915

## **INDIA (n=19)**

$z = 3.59$ ;  $p < 0.001$

$I^2 = 94.5\%$ ,  $p < 0.001$

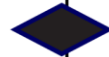

-0.24 (-2.28, 1.80)

12028

23431

## **SRI LANKA (n=2)**

$z = 12.86$ ;  $p < 0.001$

$I^2 = 0.0\%$ ,  $p = 0.337$

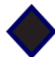

-6.59 (-7.57, -5.61)

1001

5514

## **OTHER Countries (n=10)**

$z = 1.66$ ;  $p = 0.096$

$I^2 = 84.1\%$ ,  $p < 0.001$

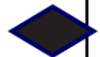

-1.51 (-3.29, 0.27)

2562

78943

-10    -5    0    5  
mmHg
