# Supplementary material for: Panethnic Differences in Blood Pressure in Europe: A Systematic Review and Meta-Analysis
Source: PubMed Central journal article supplement (PMC4725677; doi:10.1371/journal.pone.0147601), 2016-01-25
Supplement: pone.0147601.s012.pdf [file pone.0147601.s012.pdf]

# Country of Origin

**Diastolic BP  
Weighted Mean  
Difference  
(95% CI)**

*N. of Participants*  
*Migrants*      *EU  
Controls*

## **BANGLADESH (n=8)**

$z = 3.72$ ;  $p < 0.001$   
 $I^2 = 80.3\%$ ,  $p < 0.001$

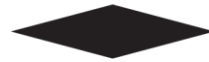

-3.16 (-4.83, -1.49)

957

7429

## **PAKISTAN (n=9)**

$z = 2.35$ ;  $p = 0.019$   
 $I^2 = 88.1\%$ ,  $p < 0.001$

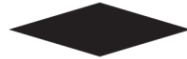

-1.78 (-3.26, -0.29)

1873

12915

## **INDIA (n=19)**

$z = 2.08$ ;  $p = 0.038$   
 $I^2 = 93.2\%$ ,  $p < 0.001$

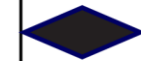

1.10 (0.06, 2.14)

12028

23431

## **SRI LANKA (n=2)**

$z = 0.50$ ;  $p = 0.617$   
 $I^2 = 97.2\%$ ,  $p < 0.001$

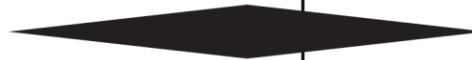

-1.00 (-4.92, 2.92)

1001

5514

## **OTHER Countries (n=8)**

$z = 1.35$ ;  $p = 0.177$   
 $I^2 = 93.3\%$ ,  $p < 0.001$

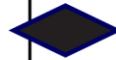

0.64 (-0.29, 1.56)

1491

19795

-5      -2.5      0      2.5      5

mmHg
