# Supplementary material for: Panethnic Differences in Blood Pressure in Europe: A Systematic Review and Meta-Analysis
Source: PubMed Central journal article supplement (PMC4725677; doi:10.1371/journal.pone.0147601), 2016-01-25

### Systolic BP - Sub Saharan African

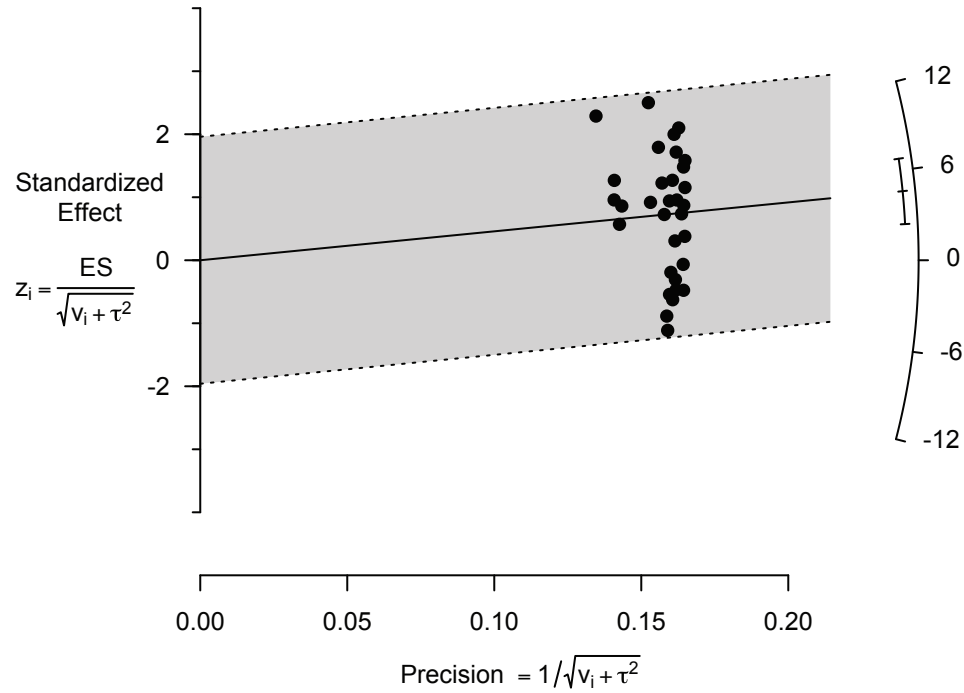

### Systolic BP - South Asian

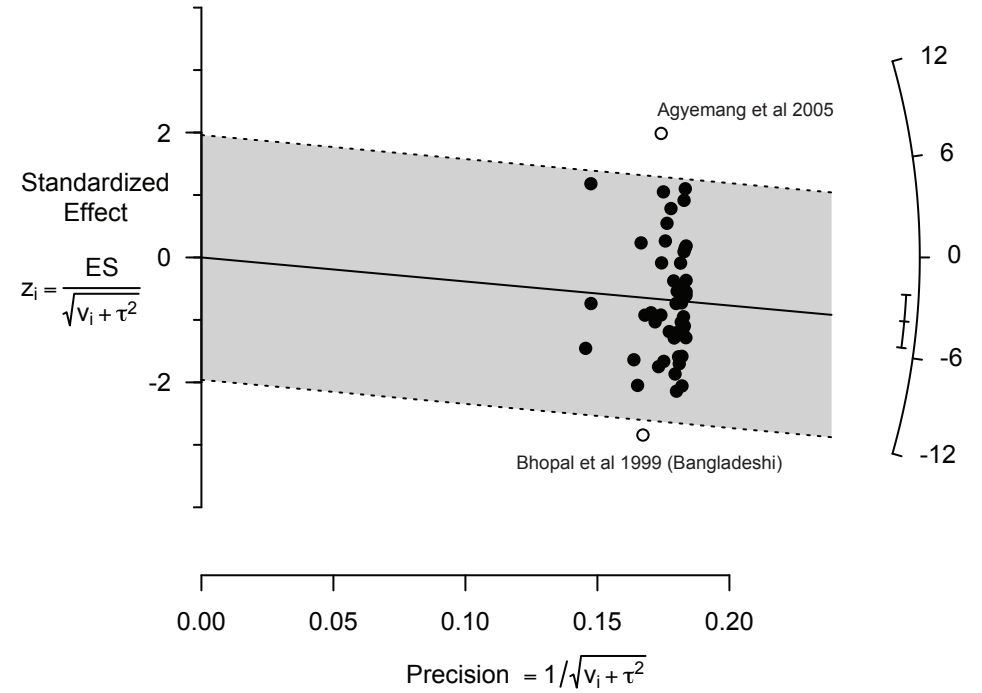

### Diastolic BP - Sub Saharan African

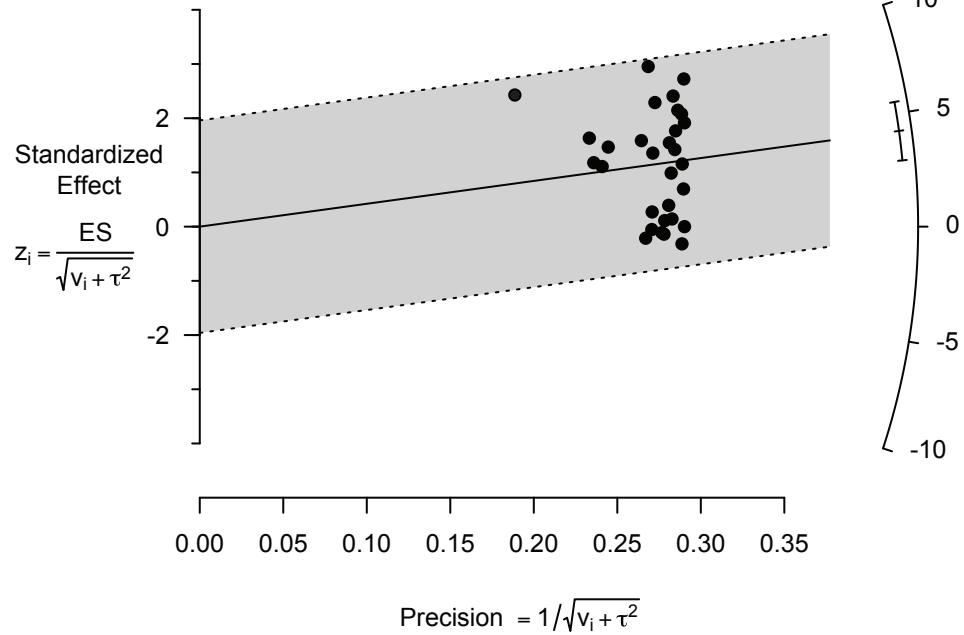

### Diastolic BP - South Asian

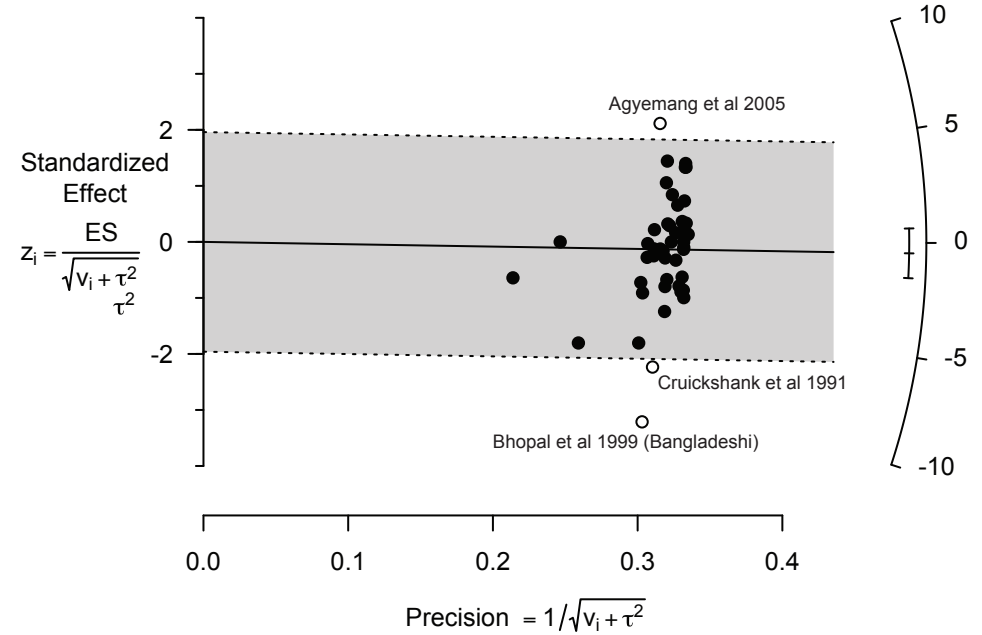

Supplement: pone.0147601.s013.pdf [file pone.0147601.s013.pdf]
